# Supplementary material for: Hollow Co3O4 nanospheres modified with RuCl3 as peroxidase mimics for sensitive determination of sulfide ions at neutral pH
Source: Royal Society of Chemistry journal article supplement (doi:10.1039/d4en00569d), 2024-01-01
Supplement: d4en00569d1.pdf [file d4en00569d1.pdf]

# Hollow $\text{Co}_3\text{O}_4$ nanospheres modified with $\text{RuCl}_3$ as peroxidase mimics for sensitive determination of sulfide ions at neutral pH

Daqing Chen, Minghui Li, Wanzhu Wang, Danhua Ge\*, Xiaojun Chen\*

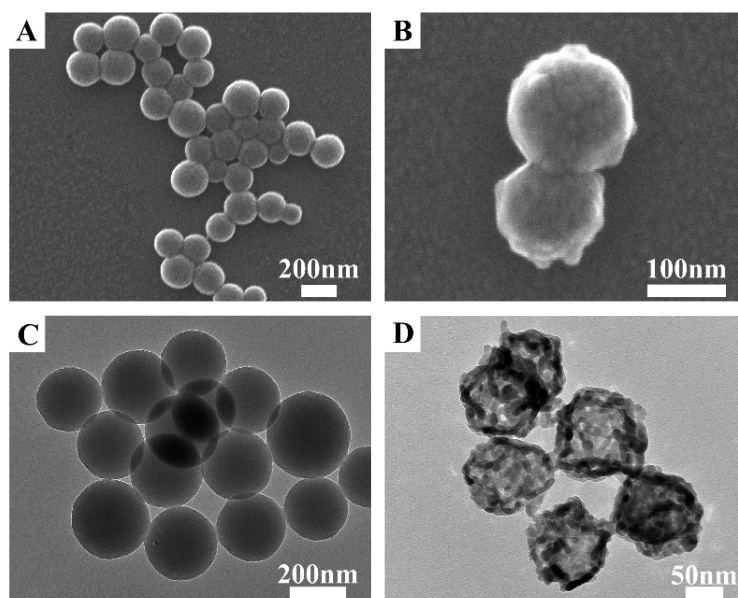

**Fig. S1.** (A) SEM and (C) TEM images of carbon nanospheres. (B) SEM and (D) TEM images of  $\text{Co}_3\text{O}_4$  HNSs.

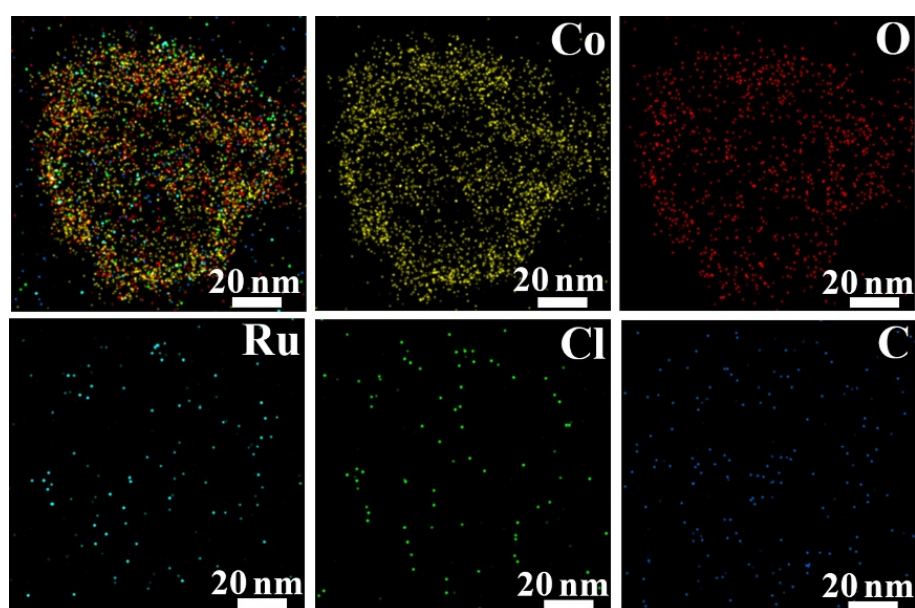

**Fig. S2.** EDX elements mapping of  $\text{Ru}^{3+}$ - $\text{Co}_3\text{O}_4$  HNSs.

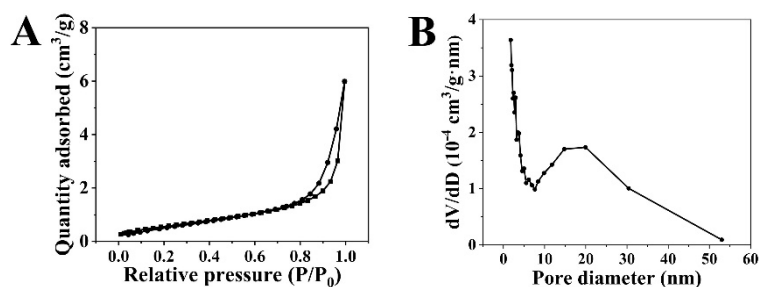

**Fig. S3.** (A)  $N_2$  adsorption-desorption isotherms of  $Co_3O_4$ . (B) Corresponding pore size distributions.

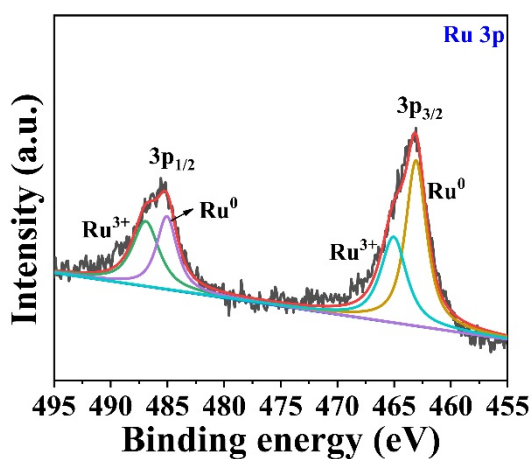

**Fig. S4.** The high resolution XPS detailed spectra of Ru 3p of  $Ru^{3+}$ - $Co_3O_4$  HNSs.

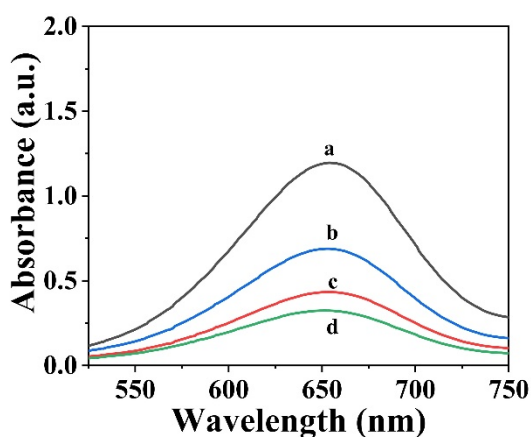

**Fig. S5.** UV-vis absorbance spectra of different reaction systems. a: TMB+ $H_2O_2$ + $Ru^{3+}$ - $Co_3O_4$  for 5 min, b: TMB+ $H_2O_2$ + $Ru^{3+}$ - $Co_3O_4$  for 5 min then removing  $Ru^{3+}$ - $Co_3O_4$  and adding  $S^{2-}$ , c: TMB+ $H_2O_2$ + $Ru^{3+}$ - $Co_3O_4$  for 5 min then adding  $S^{2-}$ , d:  $Ru^{3+}$ - $Co_3O_4$ + $S^{2-}$  for 5 min then adding TMB+ $H_2O_2$ .

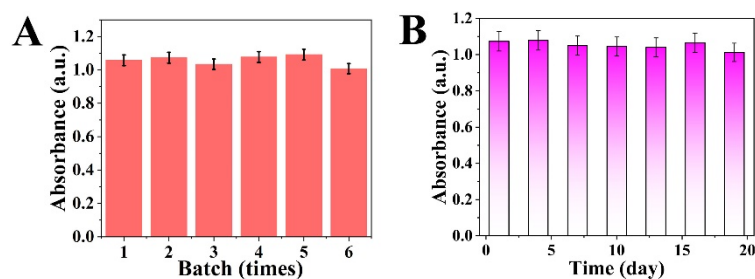

**Fig. S6.** (A) Reproducibility and (B) stability of Ru<sup>3+</sup>-Co<sub>3</sub>O<sub>4</sub> HNSs.

**Table S1.** EDX element contents of Ru<sup>3+</sup>-Co<sub>3</sub>O<sub>4</sub>.

| Element | Family | Atomic Fraction (%) | Atomic Error (%) | Mass Fraction (%) | Mass Error (%) | Fit error (%) |
|---------|--------|---------------------|------------------|-------------------|----------------|---------------|
| C       | K      | 13.16               | 2.55             | 4.57              | 0.57           | 6.43          |
| O       | K      | 42.28               | 11.47            | 19.56             | 4.45           | 1.94          |
| Cl      | K      | 0.8                 | 0.26             | 0.82              | 0.24           | 19.59         |
| Co      | K      | 43.38               | 9.81             | 73.94             | 12.62          | 0.77          |
| Ru      | L      | 0.38                | 0.11             | 1.11              | 0.27           | 18.55         |

**Table S2.** The optimum pH value of S<sup>2-</sup> was detected by different nanozymes.

| Catalyst                                                | Optimum pH value | Ref.             |
|---------------------------------------------------------|------------------|------------------|
| CuCo <sub>2</sub> O <sub>4</sub> NWs                    | 4.0              | 1                |
| ZnS NPs                                                 | 4.0              | 2                |
| FePPOP <sub>EPA</sub>                                   | 3.39             | 3                |
| Ag-Fe <sub>3</sub> O <sub>4</sub>                       | 3.5              | 4                |
| SnTe                                                    | 4.0              | 5                |
| GBR                                                     | 4.48             | 6                |
| Fe-PPOP                                                 | 3.6              | 7                |
| <b>Ru<sup>3+</sup>-Co<sub>3</sub>O<sub>4</sub> HNSs</b> | <b>7</b>         | <b>This work</b> |

**Table S3.** Comparison of the apparent Michaelis constant (K<sub>m</sub>).

| Catalyst | K <sub>m</sub> /mM |                               | Ref. |
|----------|--------------------|-------------------------------|------|
|          | TMB                | H <sub>2</sub> O <sub>2</sub> |      |

|                                                         |             |             |                  |
|---------------------------------------------------------|-------------|-------------|------------------|
| HRP                                                     | 0.43        | 1.21        | 8                |
| Mo-CQDs                                                 | 0.38        | 0.05        | 9                |
| Ru NPs                                                  | 0.234       | 2.206       | 10               |
| Pt/CuCo <sub>2</sub> O <sub>4</sub>                     | 0.24        | 0.41        | 1                |
| NGZF                                                    | 0.907       | 115.52      | 11               |
| <b>Ru<sup>3+</sup>-Co<sub>3</sub>O<sub>4</sub> HNSs</b> | <b>0.39</b> | <b>0.25</b> | <b>This work</b> |

**Table S4.** Comparison of different nanozymes for the colorimetric detection of S<sup>2-</sup> ions.

| Material                                                | Linear range (μM) | LOD (nM)  | Ref.             |
|---------------------------------------------------------|-------------------|-----------|------------------|
| βFeOOH                                                  | 5-30              | 2190      | 12               |
| Au@Ag                                                   | 1.5-10            | 500       | 13               |
| Pt/CuCo <sub>2</sub> O <sub>4</sub>                     | 0.5-10            | 85.9      | 1                |
| Ag                                                      | 0.8-6.4           | 350       | 14               |
| Carrageenan-Silver                                      | 2.5-1000          | 1700      | 15               |
| SA Fe/B-g-C <sub>3</sub> N <sub>4</sub>                 | 1-10              | 570       | 16               |
| GMP-Cu                                                  | 2-220             | 670       | 17               |
| <b>Ru<sup>3+</sup>-Co<sub>3</sub>O<sub>4</sub> HNSs</b> | <b>0.5-20</b>     | <b>51</b> | <b>This work</b> |

## Reference

1. Y. Xue, H. Li, T. Wu, H. Zhao, Y. Gao, X. Zhu and Q. Liu, Pt deposited on sea urchin-like CuCo<sub>2</sub>O<sub>4</sub> nanowires: Preparation, the excellent peroxidase-like activity and the colorimetric detection of sulfide ions, *J. Environ. Chem. Eng.*, 2022, **10**, 107228.
2. S. Song, D. Song, H. Tang, B. Kang, J. Lv, H. Lu and Z. Zhao, Ionogels as precursors to prepare ZnS nanoparticles for colorimetric sensing of sulfide ions, *ACS Sustain. Chem. Eng.*, 2020, **8**, 759-770.
3. Y. Li, Y. Fang, W. Gao, X. Guo and X. Zhang, Porphyrin-based porous organic polymer as peroxidase mimics for sulfide-ion colorimetric sensing, *ACS Sustain. Chem. Eng.*, 2020, **8**, 10870-10880.
4. Y. Wang, Y. Ding, Y. Tan, X. Liu, L. Fu and W. Qing, Ag-Fe<sub>3</sub>O<sub>4</sub> nanozyme with peroxidase-like activity for colorimetric detection of sulfide ions and dye degradation, *J. Environ. Chem. Eng.*, 2023, **11**, 109150.
5. Y. Qu, T. Chen and Y. Xu, Selective and smart dual-channel colorimetric sulfur ion sensing readout platform, *Sensor. Actuat. B-Chem.*, 2023, **392**, 134060.
6. S. Singh, K. Mitra, A. Shukla, R. Singh, R. K. Gundampati, N. Misra, P. Maiti and

- B. Ray, Brominated graphene as mimetic peroxidase for sulfide ion recognition, *Anal. Chem.*, 2017, **89**, 783-791.
7. L. Liao, D. Guo, X. Luo, L. Meng and F. Wu, Facile fabrication of iron porphyrin-based porous organic polymer with excellent oxidase-like activity for colorimetric detection of sulfide, *Colloid Surface A*, 2022, **651**, 129727.
  8. Y. Guo, L. Deng, J. Li, S. Guo, E. Wang and S. Dong, Hemin-graphene hybrid nanosheets with intrinsic peroxidase-like activity for label-free colorimetric detection of single-nucleotide polymorphism, *ACS Nano*, 2011, **5**, 1282-1290.
  9. L. Zhao, Z. Wu, G. Liu, H. Lu, Y. Gao, F. Liu, C. Wang, J. Cui and G. Lu, High-activity Mo, S co-doped carbon quantum dot nanozyme-based cascade colorimetric biosensor for sensitive detection of cholesterol, *J. Mater. Chem. B*, 2019, **7**, 7042-7051.
  10. G.-J. Cao, X. Jiang, H. Zhang, T. R. Croley and J.-J. Yin, Mimicking horseradish peroxidase and oxidase using ruthenium nanomaterials, *RSC Adv.*, 2017, **7**, 52210-52217.
  11. D. Navadeepthy, A. Rebekah, C. Viswanathan and N. Ponpandian, N-doped graphene/ZnFe<sub>2</sub>O<sub>4</sub>: A novel nanocomposite for intrinsic peroxidase based sensing of H<sub>2</sub>O<sub>2</sub>, *Mater. Res. Bull.*, 2017, **95**, 1-8.
  12. R. Purbia and S. Paria, Green synthesis of single-crystalline akaganeite nanorods for peroxidase mimic colorimetric sensing of ultralow-level vitamin B1 and sulfide ions, *ACS Appl. Nano Mater.*, 2018, **1**, 1236-1246.
  13. W. Liu, Z. Li, H. Jia, L. Zhang, W. He and Q. Meng, Shell surface sulfidation mediated the plasmonic response of Au@Ag NPs for colorimetric sensing of sulfide ions and sulfur, *Appl. Surf. Sci.*, 2019, **481**, 678-683.
  14. K. Shanmugaraj and M. Ilanchelian, Colorimetric determination of sulfide using chitosan-capped silver nanoparticles, *Microchimica Acta*, 2016, **183**, 1721-1728.
  15. Y. Wang, X. Dong, L. Zhao, Y. Xue, X. Zhao, Q. Li and Y. Xia, Facile and green fabrication of carrageenan-silver nanoparticles for colorimetric determination of Cu<sup>2+</sup> and S<sup>2-</sup>, *Nanomater. -Basel*, 2020, **10**, 83.
  16. Z. Xiao, K. Qu, F. Ye, J. Zheng, Y. Wang, H. Wang, Q. Xu and J. Xu, B-doped graphite carbon nitride loaded Fe single atoms with enhanced peroxidase-like activity, *Sci. China Mater.*, 2023, **66**, 3592-3600.
  17. H. Huang, M. Li, M. Hao, L. (Lucy) Yu and Y. Li, A novel selective detection method for sulfide in food systems based on the GMP-Cu nanozyme with laccase activity. *Talanta*, 2021, **235**, 122775.
